# Supplementary material for: Mouse enteric neurons control intestinal plasmacytoid dendritic cell function via serotonin-HTR7 signaling
Source: PubMed Central journal article supplement (PMC11511829; doi:10.1038/s41467-024-53545-2), 2024-10-25
Supplement: 41467_2024_53545_MOESM3_ESM.pdf [file 41467_2024_53545_MOESM3_ESM.pdf]

## **Description of Additional Supplementary Files**

File Name: Supplementary Movie 1.

Description: This video shows enteric serotonergic neurons in the villus.
